# Supplementary material for: Urinary laminin‐γ2 is a novel biomarker of non‐muscle invasive urothelial carcinoma
Source: PubMed Central journal article supplement — Cancer Sci. 2015 Nov 6;106(12):1730–7. doi: 10.1111/cas.12832 (PMC4714663; doi:10.1111/cas.12832), 2015-11-06
Supplement: CAS-106-00000000001730-s001.pdf [file CAS-106-00000000001730-s001.pdf]

**Supporting Information****Fig. S1. Detection of Ln- $\alpha$ 3 or - $\gamma$ 2 chains in UC tissues via immunohistochemistry.**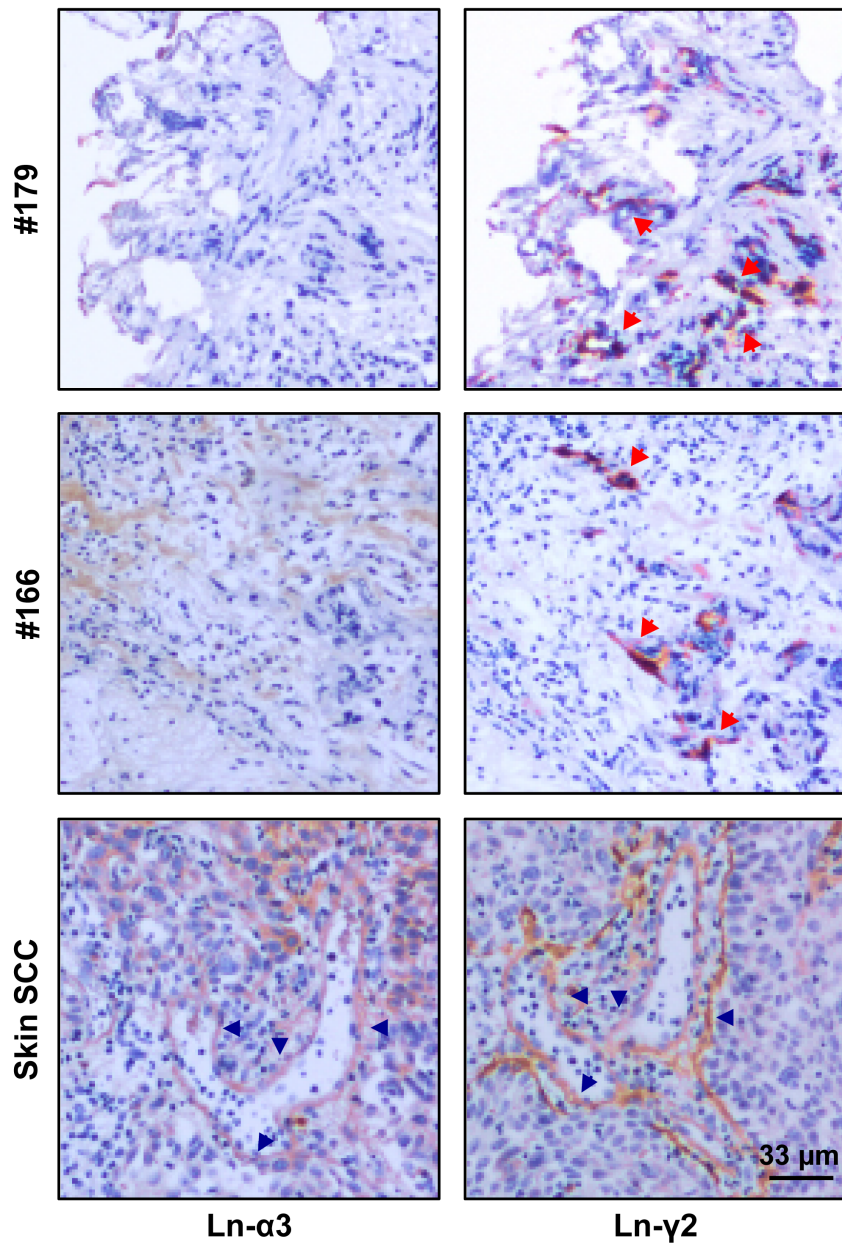

This image is an enlargement of the outline areas in Figure 2A. Bar: 33  $\mu$ m. Red arrowheads indicate UC cells expressing laminin (Ln)- $\gamma$ 2 in the patients 166 and 179 (muscle invasive UC). Black arrowheads indicate basement membranes expressing Ln- $\alpha$ 3 and Ln- $\gamma$ 2 in skin squamous cell carcinoma (skin SCC).

**Fig. S2. Quantitative analysis of Ln- $\gamma$ 2 via a sandwich ELISA.**

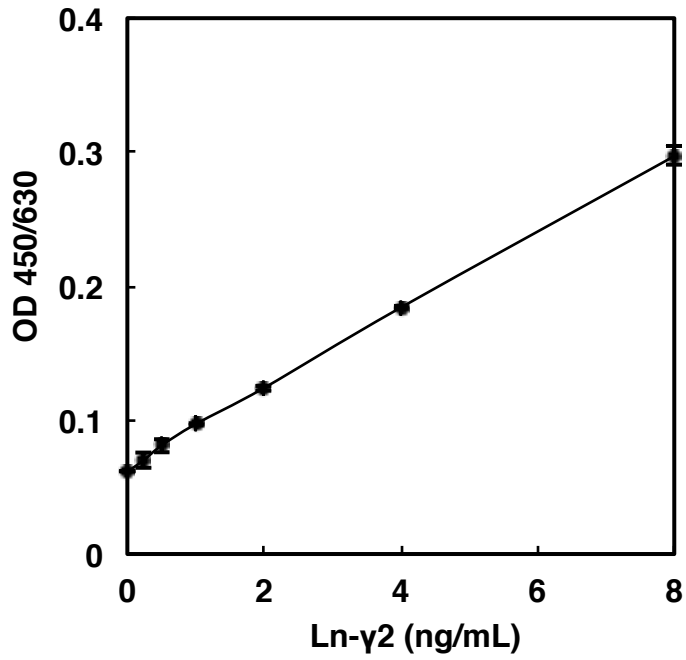

Monomeric Ln- $\gamma$ 2 was used for the standard curve (0, 0.25, 0.5, 1, 2, 4, and 8 ng/mL), and was detected using the D4B5 antibody and horseradish peroxidase-linked IgG. OD: optical density.

Fig. S3. Two cases with measured Ln- $\gamma$ 2/crn levels during the postoperative course highlight the

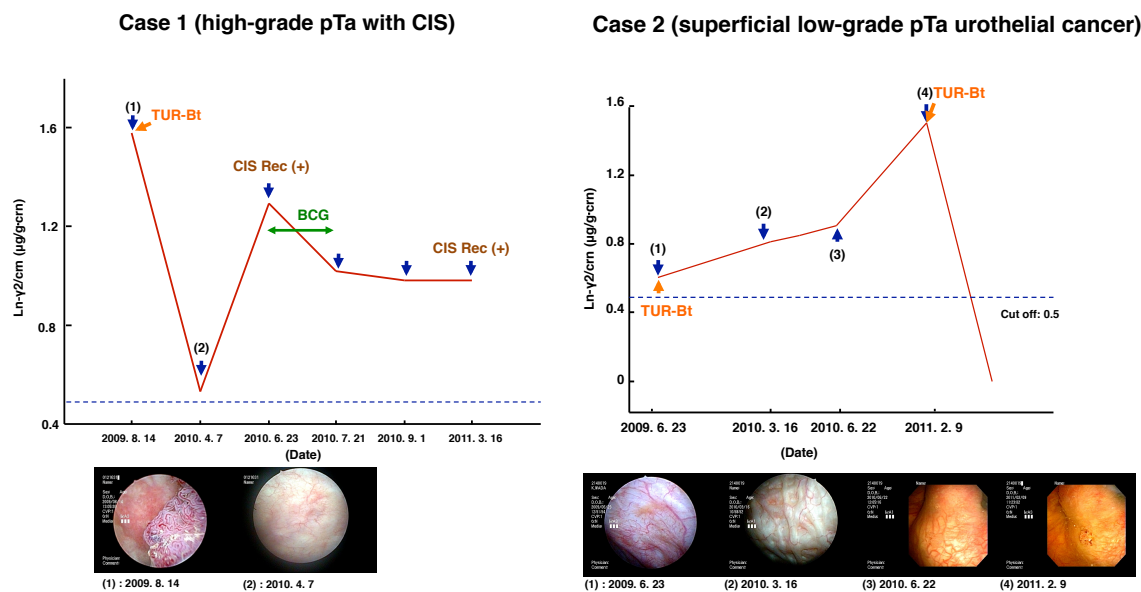

relationship between urothelial cancer (UC) recurrence and Ln- $\gamma$ 2/crn values.

**(A) Case 1:** Cystoscopy revealed papillary bladder cancer and CIS at 1.6  $\mu\text{g/g}\cdot\text{crn}$  of Ln- $\gamma$ 2/crn (1). After TUR-BT was performed, Ln- $\gamma$ 2/crn decreased to 0.5  $\mu\text{g/g}\cdot\text{crn}$ , although cystoscopy revealed recurrent UC at 7 months (2). At 9 months, CIS was observed and intravesical Bacillus Calmette–Guerin (BCG) immunotherapy was performed. Although Ln- $\gamma$ 2/crn decreased to 1.0  $\mu\text{g/g}\cdot\text{crn}$ , it did not decrease below the cut-off value of 0.5  $\mu\text{g/g}\cdot\text{crn}$ . Cystoscopy revealed no recurrent UC, although urine cytology revealed possible UC at 9 months after the second treatment, and recurrent UC was detected in the renal pelvis.

**(B) Case 2:** Bladder cancer was observed via cystoscopy at 0.6  $\mu\text{g/g}\cdot\text{crn}$  of Ln- $\gamma$ 2/crn (1), and transurethral resection of bladder cancer (TUR-Bt) was performed for the UC. Although no recurrent UC was observed at 9 months after the TUR-Bt, the Ln- $\gamma$ 2/crn was elevated to 0.8  $\mu\text{g/g}\cdot\text{crn}$  (2). At 12 months, small recurrent UC was found via cystoscopy, and the Ln- $\gamma$ 2/crn had increased to 0.9  $\mu\text{g/g}\cdot\text{crn}$  (3). At 19 months, the recurrent UC bled and the Ln- $\gamma$ 2/crn was 1.5  $\mu\text{g/g}\cdot\text{crn}$  (4). After TUR-Bt was performed for the recurrent UC, the Ln- $\gamma$ 2/crn decreased to below the cut-off value.

**Table S1. Diagnosis of patients with urological diseases.**

Supplimentary table

| No  | Diagnosis       | Diagnosis_txt                            |
|-----|-----------------|------------------------------------------|
| 116 | No malignancy   | Benign Hypertrophy                       |
| 119 | Prostate ca     | Prostate ca                              |
| 120 | other ca        | Testicular Ca                            |
| 126 | Prostate ca     | Pca                                      |
| 127 | Prostate ca     | Prostate ca                              |
| 128 | Bladder ca      | Bladder ca                               |
| 129 | Bladder ca      | Bladder ca                               |
| 131 | Prostate ca     | Prostate ca                              |
| 132 | Prostate ca     | Prostate ca                              |
| 133 | Prostate ca     | Prostate ca                              |
| 134 | Prostate ca     | Prostate ca                              |
| 135 | No malignancy   | Prostatitis                              |
| 137 | Prostate ca     | Prostate ca                              |
| 140 | Prostate ca     | Prostate ca                              |
| 141 | Renal pelvic ca | Renal pelvic ca                          |
| 143 | Bladder ca      | BCa post                                 |
| 144 | No malignancy   | Benign Hypertrophy                       |
| 145 | Prostate ca     | Prostate ca                              |
| 146 | Renal pelvic ca | Renal Pelvic Ca                          |
| 147 | No malignancy   | Functioning adrenal adenoma              |
| 149 | No malignancy   | Hemorrhagic renal cyst                   |
| 150 | Bladder ca      | Bladder ca                               |
| 151 | Renal ca        | Renal ca with von Hippel Lindau disease  |
| 152 | No malignancy   | No disease                               |
| 153 | Prostate ca     | Prostate ca                              |
| 155 | Bladder ca      | Bladder ca                               |
| 158 | Bladder ca      | Bladder ca                               |
| 160 | Bladder ca      | Bladder ca                               |
| 161 | Bladder ca      | Bladder ca                               |
| 162 | Bladder ca      | Bladder ca                               |
| 163 | Renal ca        | Renal ca                                 |
| 164 | other ca        | Testicular Ca                            |
| 165 | Bladder ca      | Bladder ca                               |
| 166 | Bladder ca      | Bladder ca                               |
| 167 | No malignancy   | Benign Hypertrophy                       |
| 168 | No malignancy   | Benign Hypertrophy                       |
| 169 | Prostate ca     | Prostate ca                              |
| 170 | No malignancy   | Prostate ca                              |
| 171 | No malignancy   | No disease                               |
| 172 | No malignancy   | Ureteric stricture                       |
| 173 | No malignancy   | Bladder ca                               |
| 174 | Renal ca        | Renal ca                                 |
| 175 | No malignancy   | Ureteric stricture                       |
| 176 | other ca        | Renal pelvic ca with multiple metastases |
| 177 | Bladder ca      | Bladder ca                               |
| 179 | Bladder ca      | Bladder ca                               |
| 180 | Bladder ca      | Prostate ca                              |
| 181 | Prostate ca     | Prostate ca                              |
| 182 | No malignancy   | Prostate ca                              |
| 184 | Bladder ca      | Bladder ca                               |
| 185 | Renal ca        | Renal ca                                 |
| 186 | No malignancy   | Pca                                      |
| 188 | other ca        | Renal ca                                 |
| 190 | Bladder ca      | Bladder ca                               |
| 191 | No malignancy   | post operative bladder ca                |
| 192 | Prostate ca     | Prostate ca                              |
| 193 | Bladder ca      | Bladder ca                               |
| 194 | Prostate ca     | Prostate ca                              |
| 195 | Prostate ca     | Prostate ca                              |
| 196 | Renal ca        | Ranal ca                                 |
